# Supplementary material for: Can simple models predict large scale surface ocean isoprene concentrations?
Source: Copernicus journal article supplement (doi:10.5194/acp-2016-469), 2016-06-22
Supplement: Supplementary file 1 [file acp-2016-469-supplement.pdf]

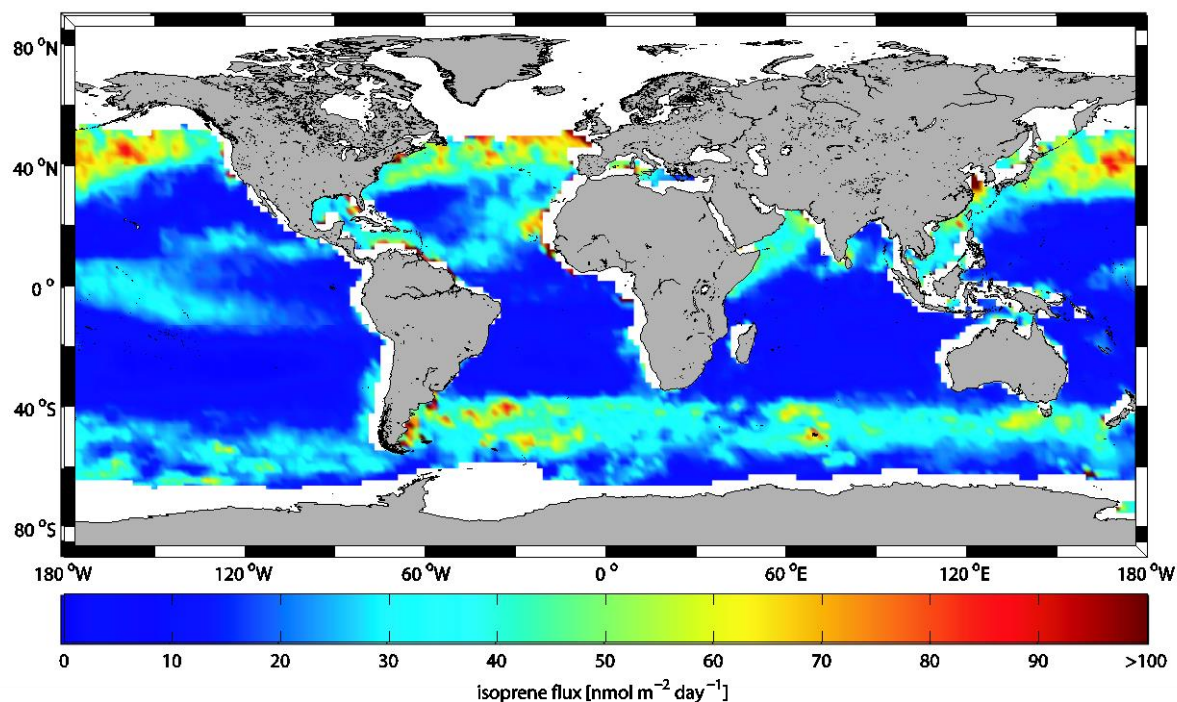

Figure S1: Global monthly mean marine isoprene fluxes in nmol m<sup>-2</sup> day<sup>-1</sup> for January 2014.

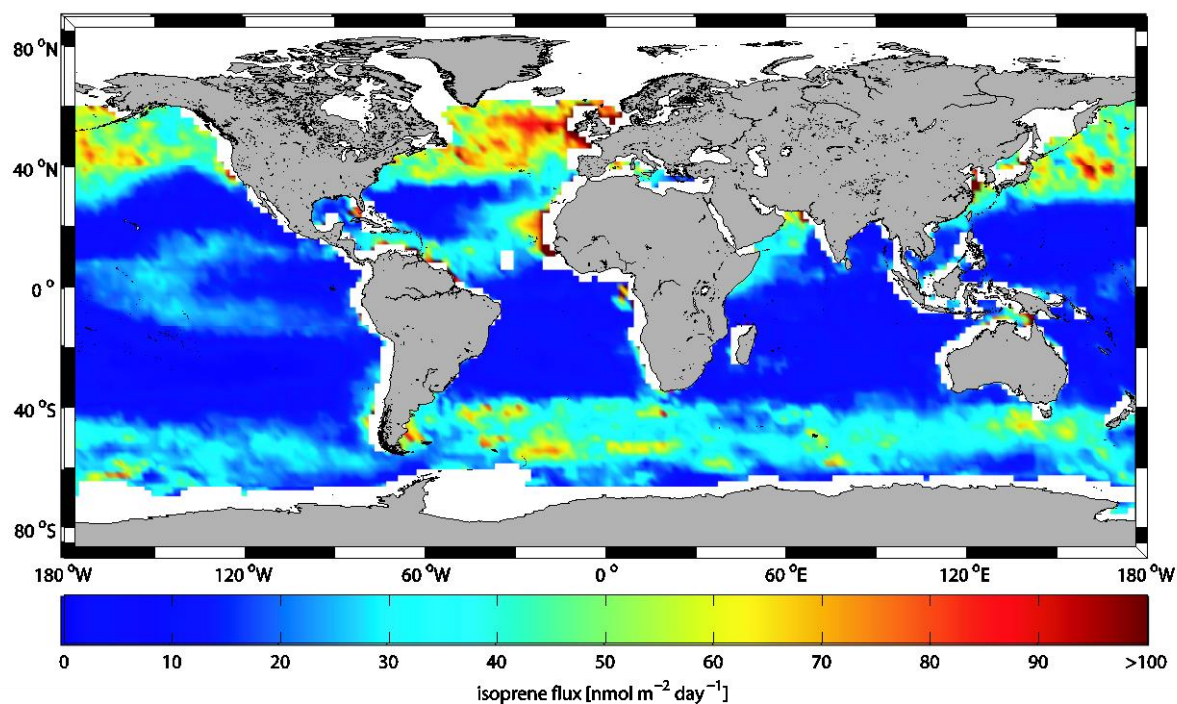

Figure S2: Global monthly mean marine isoprene fluxes in nmol m<sup>-2</sup> day<sup>-1</sup> for February 2014.

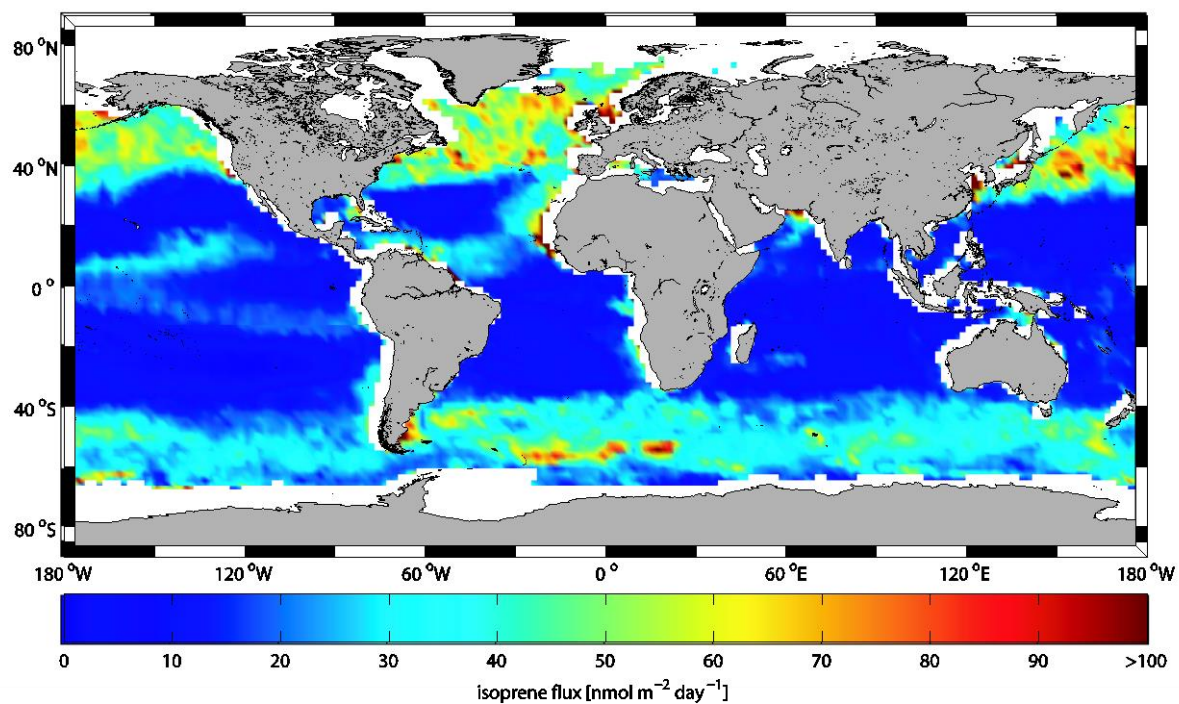

Figure S3: Global monthly mean marine isoprene fluxes in nmol m<sup>-2</sup> day<sup>-1</sup> for March 2014.

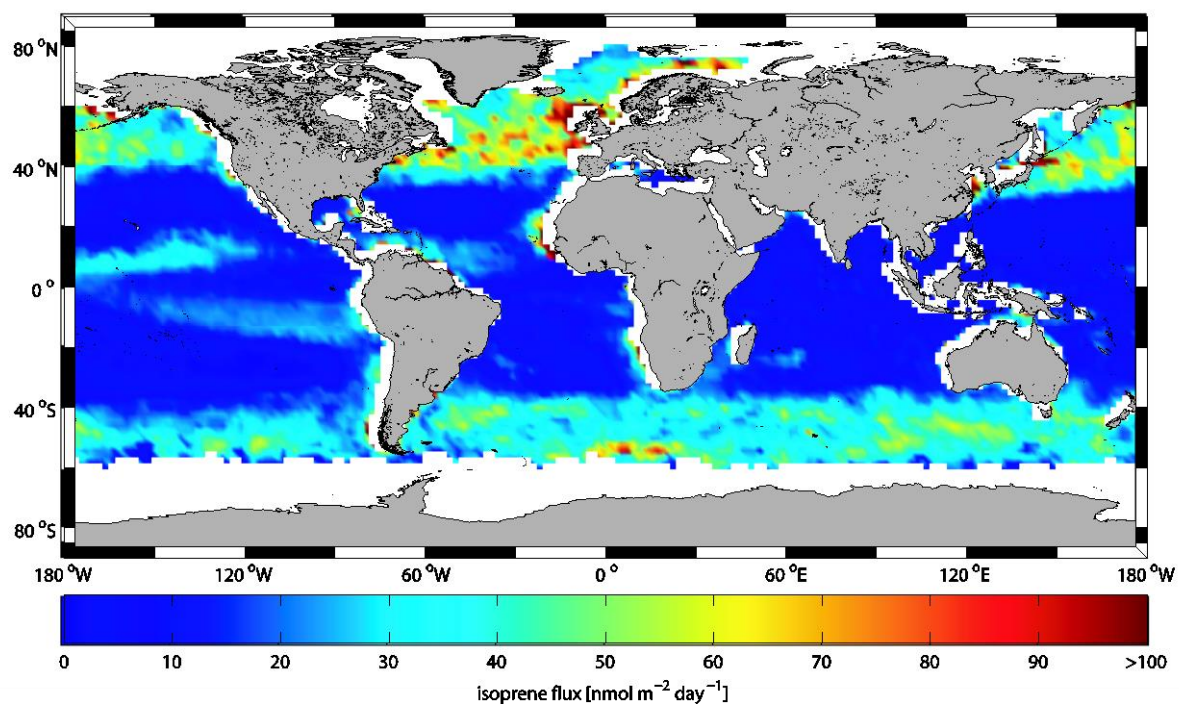

Figure S4: Global monthly mean marine isoprene fluxes in nmol m<sup>-2</sup> day<sup>-1</sup> for April 2014.



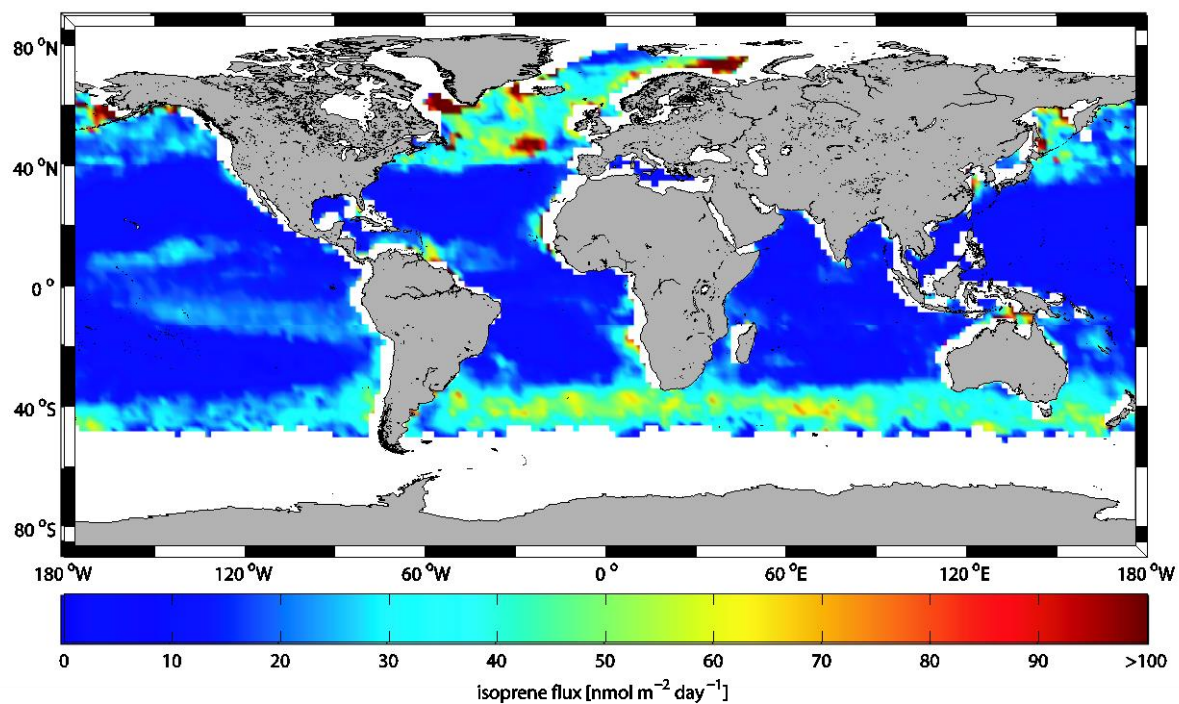

Figure S5: Global monthly mean marine isoprene fluxes in nmol m<sup>-2</sup> day<sup>-1</sup> for May 2014.

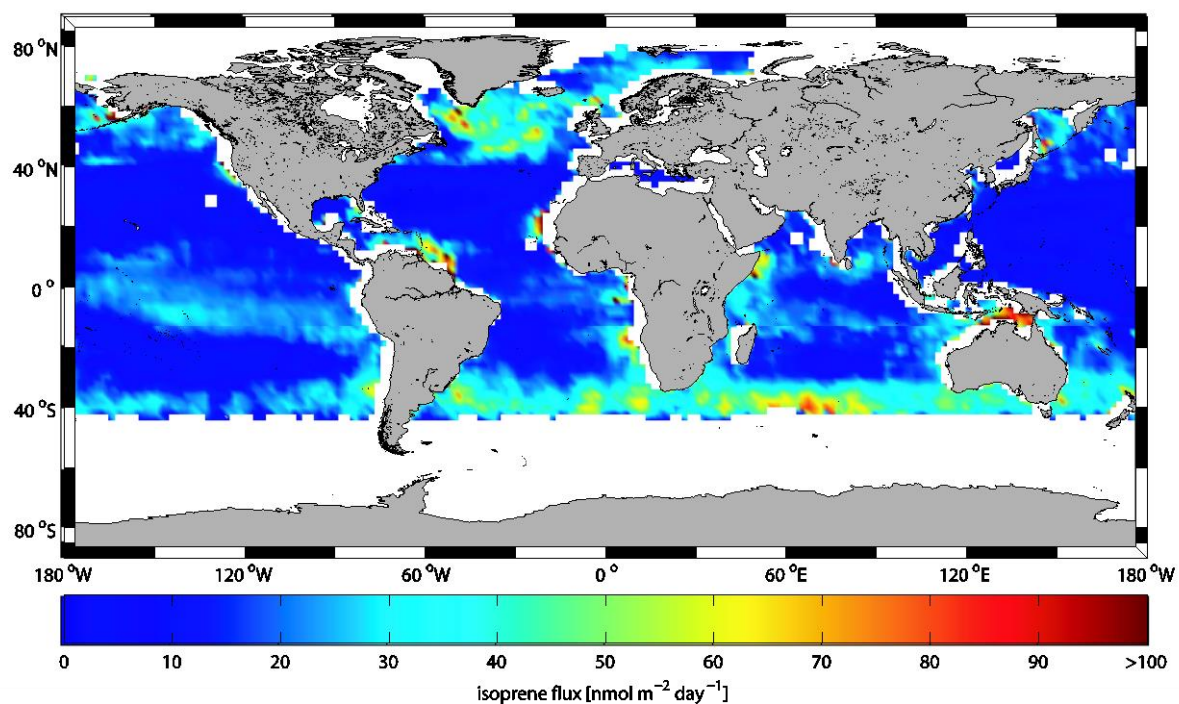

Figure S6: Global monthly mean marine isoprene fluxes in nmol m<sup>-2</sup> day<sup>-1</sup> for June 2014.

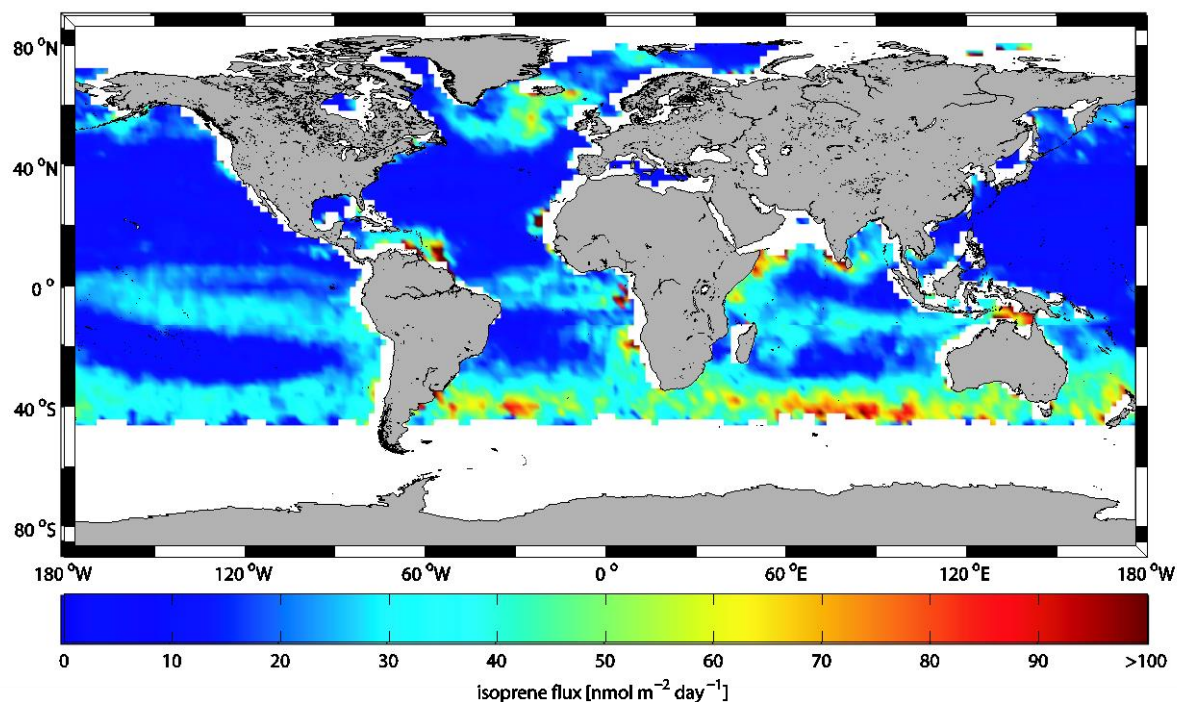

Figure S7: Global monthly mean marine isoprene fluxes in nmol m<sup>-2</sup> day<sup>-1</sup> for July 2014.

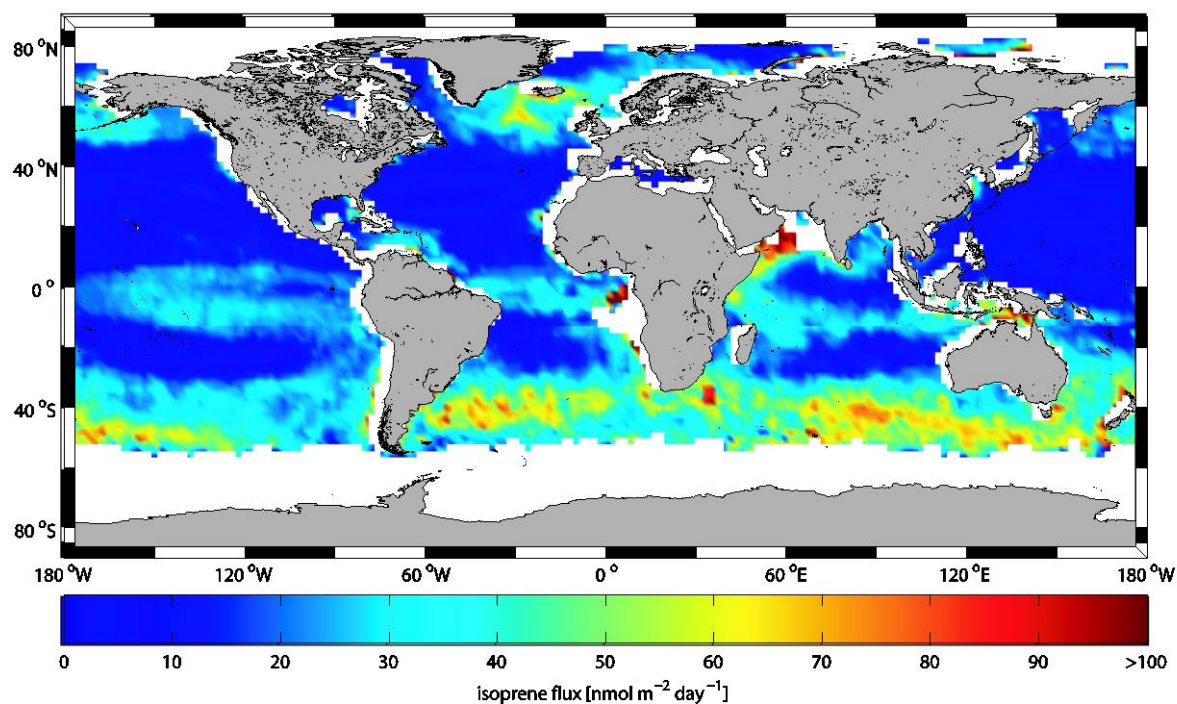

Figure S8: Global monthly mean marine isoprene fluxes in nmol m<sup>-2</sup> day<sup>-1</sup> for August 2014.



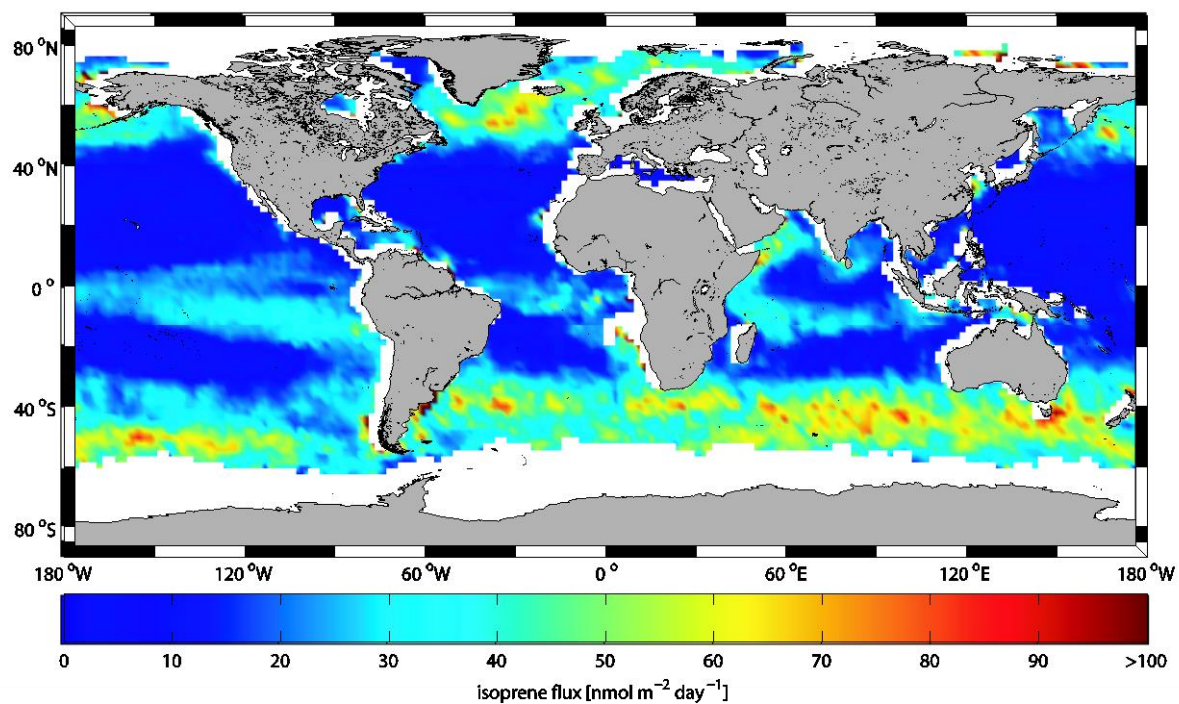

Figure S9: Global monthly mean marine isoprene fluxes in nmol m<sup>-2</sup> day<sup>-1</sup> for September 2014.

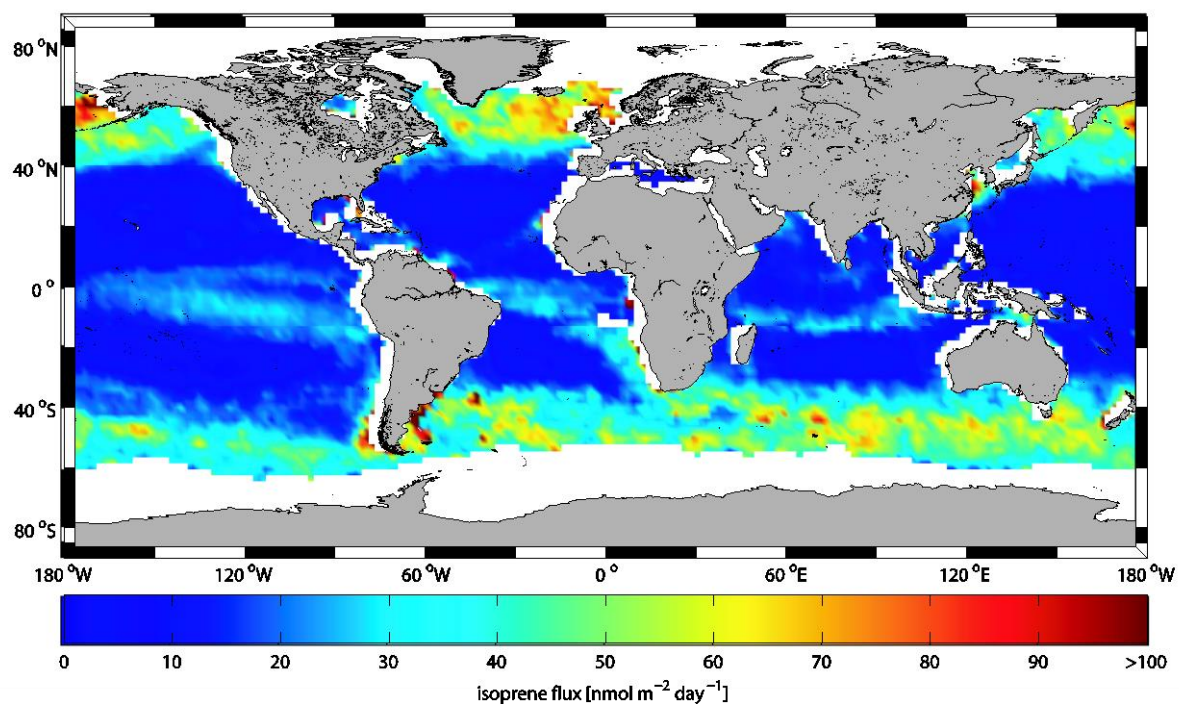

Figure S10: Global monthly mean marine isoprene fluxes in nmol m<sup>-2</sup> day<sup>-1</sup> for October 2014.

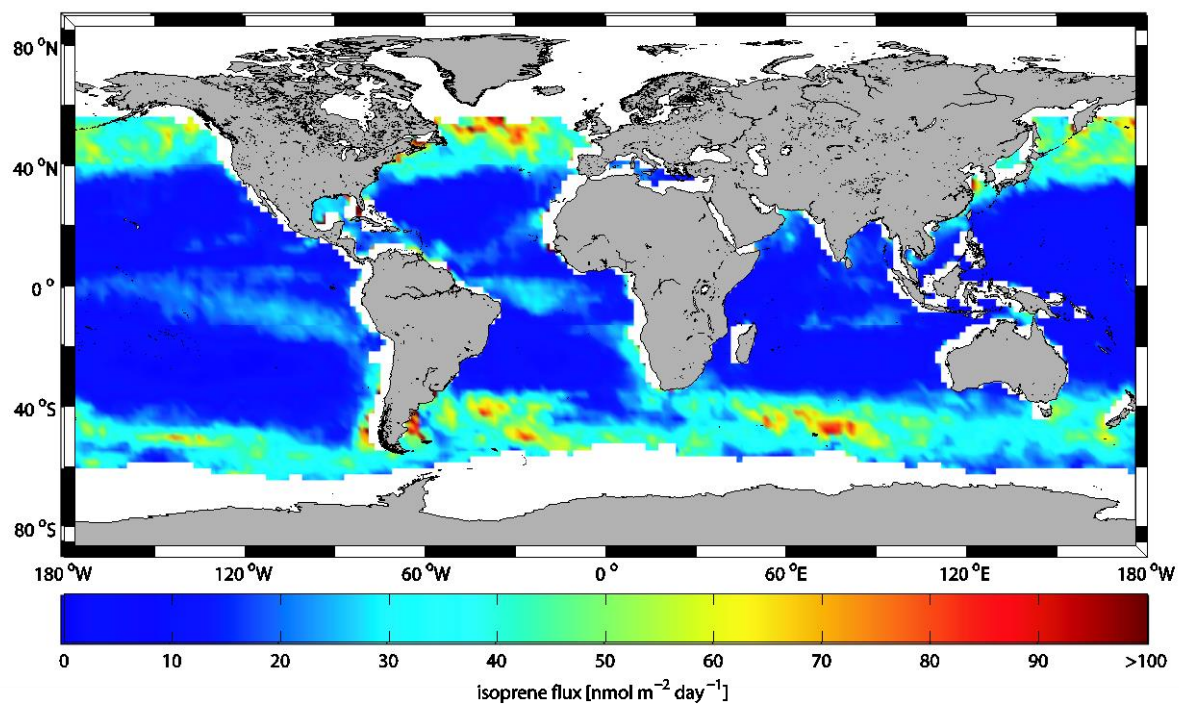

Figure S11: Global monthly mean marine isoprene fluxes in nmol m<sup>-2</sup> day<sup>-1</sup> for November 2014.

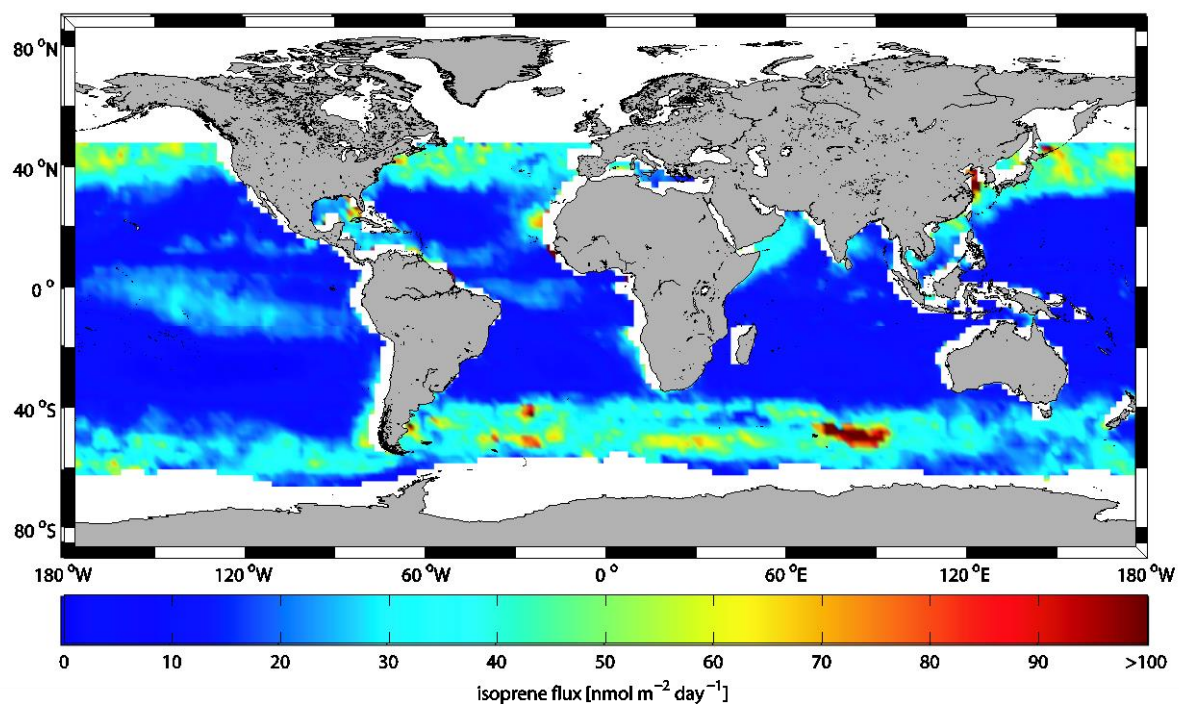

Figure S12: Global monthly mean marine isoprene fluxes in nmol m<sup>-2</sup> day<sup>-1</sup> for December 2014.
